# Supplementary material for: A highly efficient MoOx/Fe2O3 photoanode with rich vacancies for photoelectrochemical O2 evolution from water splitting
Source: Royal Society of Chemistry journal article supplement (doi:10.1039/d3nj04536f), 2024-01-01
Supplement: d3nj04536f1.pdf [file d3nj04536f1.pdf]

# Highly efficient MoO<sub>x</sub>/Fe<sub>2</sub>O<sub>3</sub> photoanode with rich vacancies for photoelectrochemical O<sub>2</sub> evolution from water splitting

## Supporting information

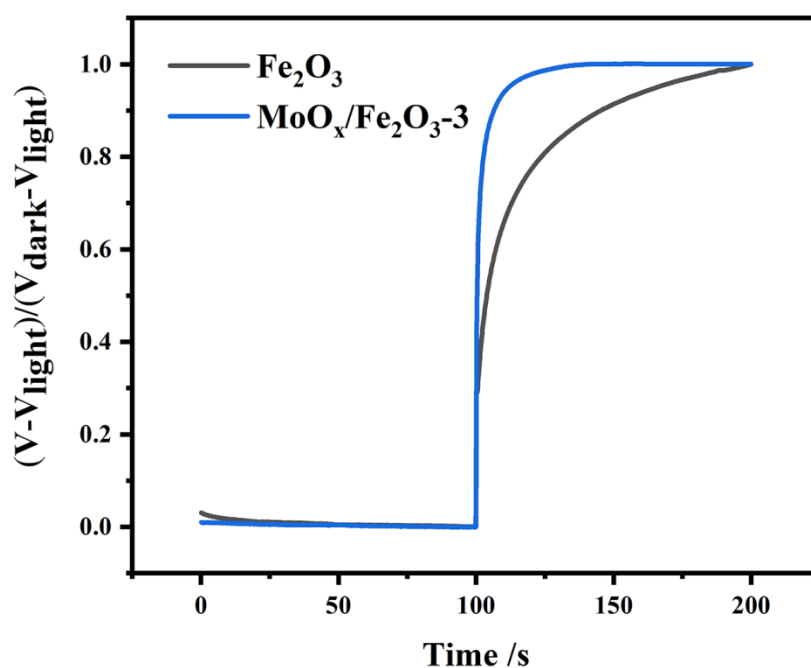

Figure S1. The normalized OCP decay curves of Fe<sub>2</sub>O<sub>3</sub> and MoO<sub>x</sub>/Fe<sub>2</sub>O<sub>3</sub>-3.

Table 1 Resistance values of Fe<sub>2</sub>O<sub>3</sub>, MoO<sub>x</sub>/Fe<sub>2</sub>O<sub>3</sub>-3 photoanode after EIS curve fitting

| Photoanode                                          | R <sub>1</sub> (Ω) | R <sub>2</sub> (Ω) | R <sub>3</sub> (Ω) | CPE1  | CPE2    |
|-----------------------------------------------------|--------------------|--------------------|--------------------|-------|---------|
| Fe <sub>2</sub> O <sub>3</sub>                      | 142.7              | 1651               | 2562               | 1.008 | 0.65687 |
| MoO <sub>x</sub> /Fe <sub>2</sub> O <sub>3</sub> -3 | 34.53              | 24.96              | 304.4              | 1.223 | 0.67811 |
